# Supplementary material for: Investigation of physico-chemical behaviour of local anaesthetics in aqueous SDS solutions
Source: Royal Society of Chemistry journal article supplement (doi:10.1039/b716813f), 2008-01-01
Supplement: b716813f.pdf [file b716813f.pdf]

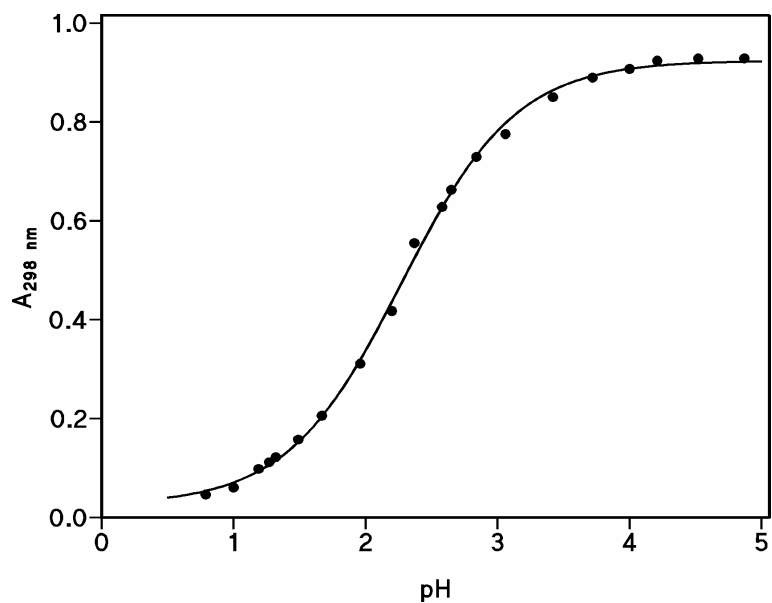

**Figure S1.** Spectrophotometric titration of tetracaine in aqueous buffered solutions of acetic acid-acetate and its chloro-derivatives

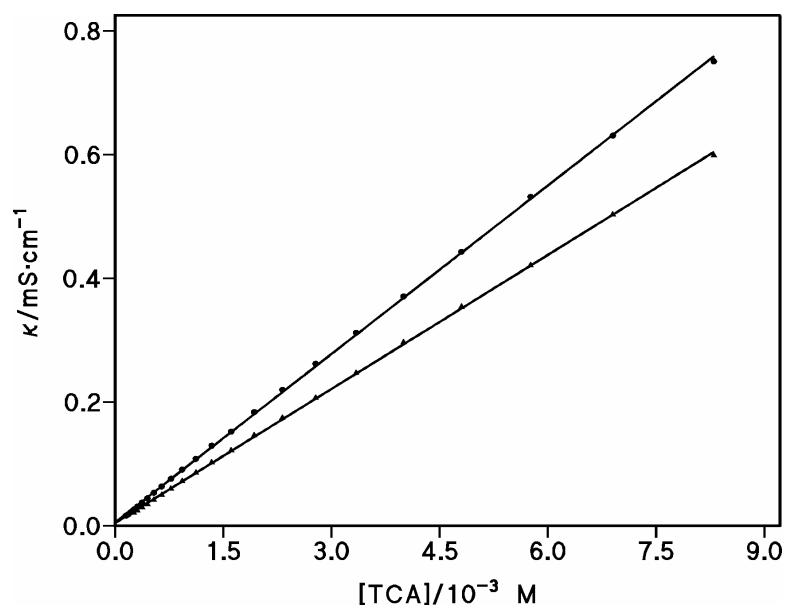

**Figure S2.** Specific conductivity of aqueous solutions of tetracaine measured at (●)25 °C and (▲)15 °C.

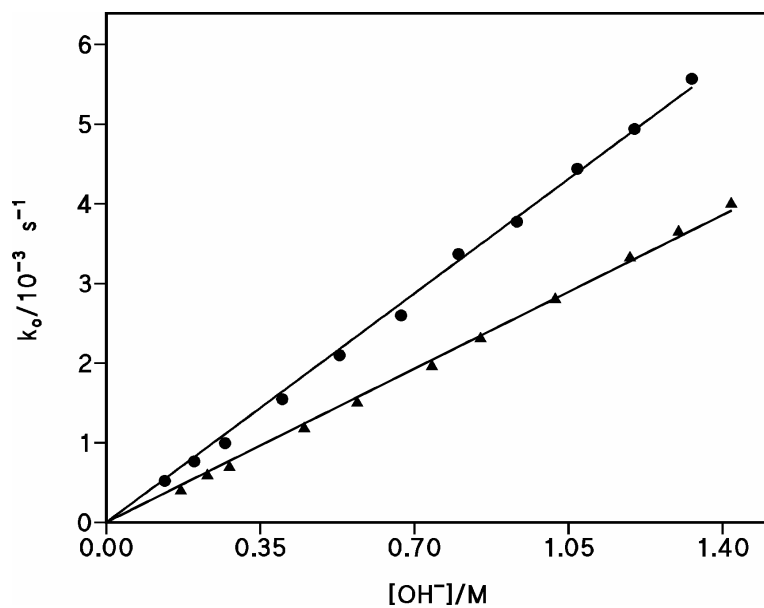

**Figure S3.** - Plots of the observed pseudo-first order rate constant,  $k_o$ , for the alkaline hydrolysis of (●)NOV and (▲)TCA measured at 25 °C as a function of  $[\text{OH}^-]$ .

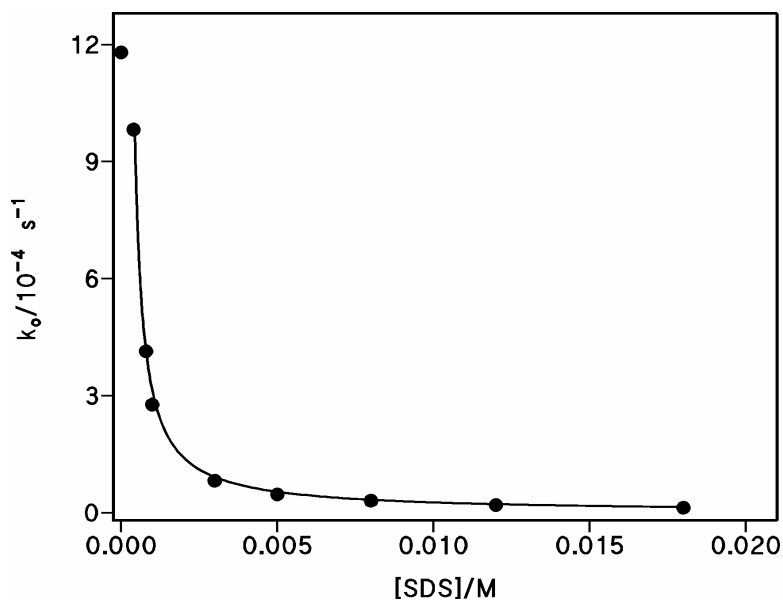

**Figure S4.** Influence of SDS on the alkaline hydrolysis of TCA at  $[\text{OH}^-]=0.40 \text{ M}$  and 25 °C.
